# Supplementary material for: An Association between Decreased Small Intestinal RNA Modification and Disturbed Glucagon-like Peptide-1 Secretion under High-Fat Diet Stress
Source: MDPI journal article supplement (doi:10.3390/nu15173707), 2023-08-24

## Supplementary Materials

for

# An Association between Decreased Small Intestinal RNA Modification and Disturbed Glucagon-like Peptide-1 Secretion under High-Fat Diet Stress

Jiang Chen <sup>1,2,†</sup>, Lin-Ling Deng <sup>1,†</sup>, Xing-Lin Xiao <sup>1,†</sup>, Shi-Yuan Long <sup>1</sup>, Yuan Deng <sup>1</sup>, Tong Peng <sup>2,3</sup>, Jie Xie <sup>1</sup> and Xiao-Yu Zhang <sup>1,\*</sup>

<sup>1</sup> College of Life Sciences, Sichuan Normal University, Chengdu 610101, China; chenjiang2019@163.com (J.C.)

<sup>2</sup> College of Life Sciences, Sichuan University, Chengdu 610065, China; pobo66@gmail.com

<sup>3</sup> Keystonecare Technology (Chengdu) Co., Ltd., No.200 Tianfu 5th Street, Chengdu 610094, China

\* Correspondence: zhangxy2005@126.com

† These authors contributed equally to this work.

### Content:

**Table S1 Ingredients of normal-chew and high-fat diet**

**Table S2 Sequence of the used primers**

**Figure S1 Typical mass chromatogram of A and m6A**

**Figure S2 High-fat diet induced a typical obesity on mice**

**Figure S3 High-fat diet induced the microbiota dysbiosis**

**Figure S4 Obesity was intensified on pseudo-sterile mice receiving feces of DIO mice after fed with high-fat diet**

**Table S1 Ingredients of normal-chew and high-fat diet**

| Serial number | Normal-chew Diet<br>(D12450B) |       | High-fat Diet<br>(D12492) |       |
|---------------|-------------------------------|-------|---------------------------|-------|
|               | g%                            | Kcal% | g%                        | Kcal% |
| Macronutrient |                               |       |                           |       |
| Protein       | 19.2                          | 20.0  | 26.2                      | 20.0  |
| Carbohydrate  | 67.3                          | 70.0  | 26.3                      | 20.1  |
| Fat           | 4.3                           | 10.0  | 34.9                      | 59.9  |
| Total         | -                             | 100.0 | -                         | 100.0 |
| Kcal/g*       | 3.85                          |       | 5.24                      |       |

  

| Ingredient                        | g              | Kcal        | g             | Kcal        |
|-----------------------------------|----------------|-------------|---------------|-------------|
| Casein, 80 mesh meshes            | 200            | 800         | 200           | 800         |
| DL-Methionine                     | 3              | 12          | 3             | 12          |
| Corn starch                       | 315            | 1260        | 0             | 0           |
| Maltodextrin 10                   | 35             | 140         | 125           | 500         |
| Sucrose                           | 350            | 1400        | 68.8          | 275.2       |
| Cellulose BW20                    | 50             | 0           | 50            | 0           |
| Soybean oil                       | 25             | 225         | 25            | 225         |
| Lard                              | 20             | 180         | 245           | 2205        |
| Complex mineral                   | 10             | 0           | 10            | 0           |
| Dicalcium phosphate               | 13             | 0           | 13            | 0           |
| Calcium carbonate                 | 5.5            | 0           | 5.5           | 0           |
| Potassium citrate,<br>monohydrate | 16.5           | 0           | 16.5          | 0           |
| Multivitamin V10001               | 10             | 40          | 10            | 40          |
| Choline Bitartrate                | 2              | 0           | 2             | 0           |
| FD&C Yellow Dye #5<br>Pigment     | 0.05           | 0           | 0             | 0           |
| FD&C Red Dye #40<br>Pigment       | 0              | 0           | 0             | 0           |
| FD&C Blue Dye #1                  | 0              | 0           | 0.05          | 0           |
| Total                             | <b>1055.05</b> | <b>4057</b> | <b>773.85</b> | <b>4057</b> |

\* Nutrient to calorie ratio (Kcal/g) was used to measure the amount of a specific nutrient (or group of nutrients) in a diet per calorie.

**Table S2 Sequence of the used primers**

| <b>Gene name</b> | <b>Primers</b>                                                      |
|------------------|---------------------------------------------------------------------|
| <i>gcg</i>       | Forward: AGCGACTACAGCAAATAC<br>Reverse: GTTCCTCTTGGTGTTTCAT         |
| <i>pc3</i>       | Forward: AAGTGGTCGTTACAGATGTGA<br>Reverse: AGAATCCTTGGTCCGTGTT      |
| <i>mettl3</i>    | Forward: ATCCAGGCCCATAGAAACAG<br>Reverse: CTATCACTACGGAAGGTTGGG     |
| <i>mettl14</i>   | Forward: CTGAGAGTGCGGATAGCATTG<br>Reverse: GAGCAGATGTATCATAGGAAGCC  |
| <i>wtap</i>      | Forward: GCCCCAACGTTTAAGTGCAG<br>Reverse: AGCATTTCGACACTTCGCCAT     |
| <i>gapdh</i>     | Forward: TTCCAGTATGACTCTACCCACGGCA<br>Reverse: GCACCAGCATCACCCCATTG |

0  
1  
2  
3

**Figure S1 Typical mass chromatogram of Adenosine, m6A, Cytidine and m5C.**

(A) Total ion chromatography (TIC) of the digested samples; (B-E) Selected ion recording (SIR) of A, m6A, C, m5C.

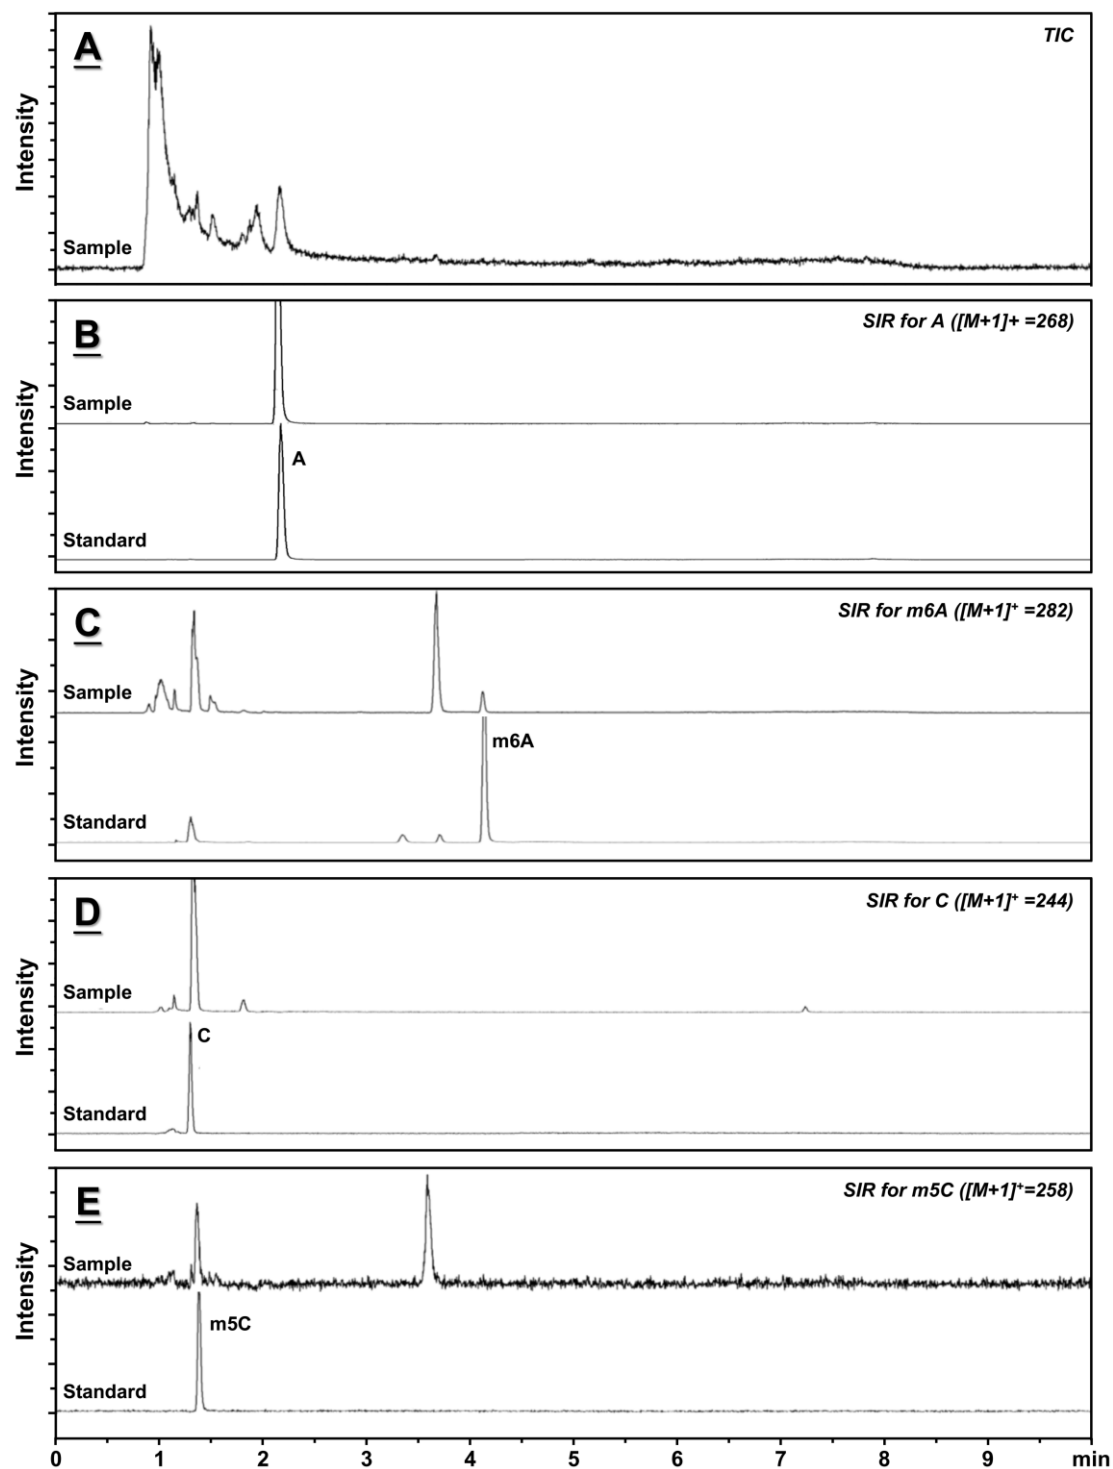

**Figure S2 High-fat diet induced a typical obesity on mice (n =6).**

(A) body weight; (B) fat mass; (C) adipocyte size of epididymis fat; (D) liver mass; (E) Lee's index; (F) fasting blood glucose; (G) fasting serum insulin; (H) homeostasis model assessment (HOMA)-insulin resistance (IR) index; (I) HOMA-insulin sensitivity (IS) index; Blood contents of (J) total cholesterol (TC), (K) triglycerides (TG), (L) low density lipoprotein (LDL) and (M) high density lipoprotein (HDL). For statistical differences, \* for  $P<0.05$ , while \*\* for  $P<0.01$ , \*\*\* for  $P<0.001$  and \*\*\*\* for  $P<0.0001$ .

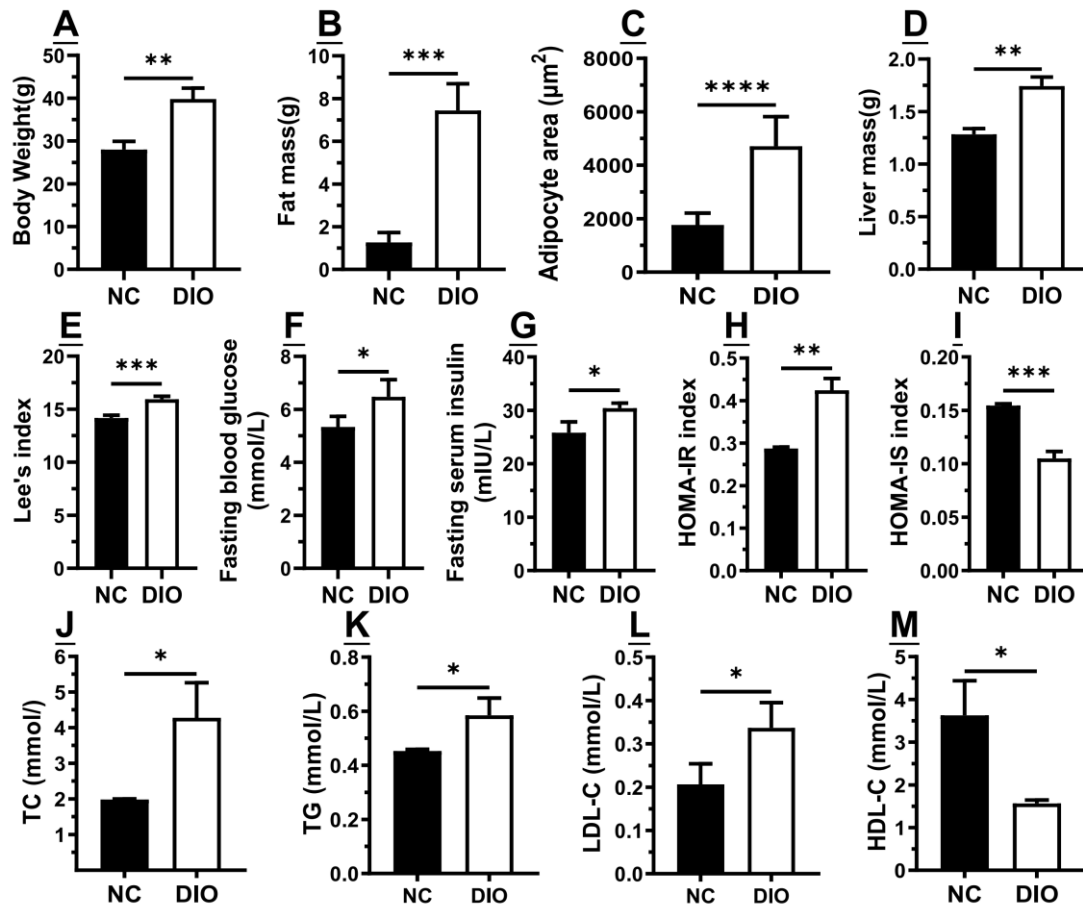

**Figure S3 High-fat diet induced the microbiota dysbiosis (n = 3).**

(A) Shannon index and (B) Chao1 index on OUT level of fecal microbiota of NC and DIO mice; (C) Phylum-level and (D) Genus-level distribution of fecal microbiota of NC and DIO mice; (E) Principal components analysis (PCA) of fecal microbiota. For statistical differences, ns indicates  $P > 0.05$ , while \* for  $P < 0.05$ .

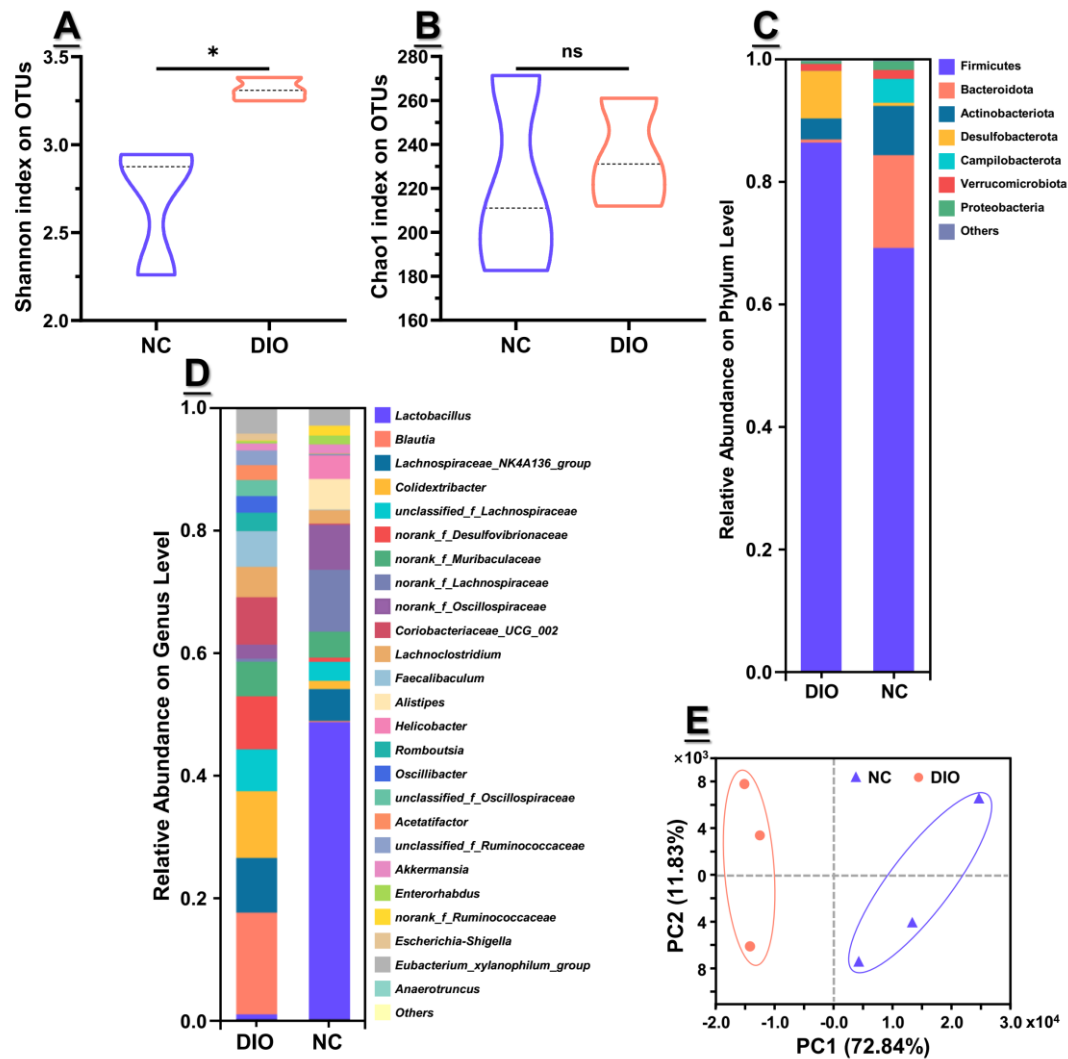

**Figure S4 Obesity was intensified on pseudo-sterile mice receiving feces of DIO mice after fed with high-fat diet.**

(A) habitus of mice and (B) H&E staining of their epididymis fat.

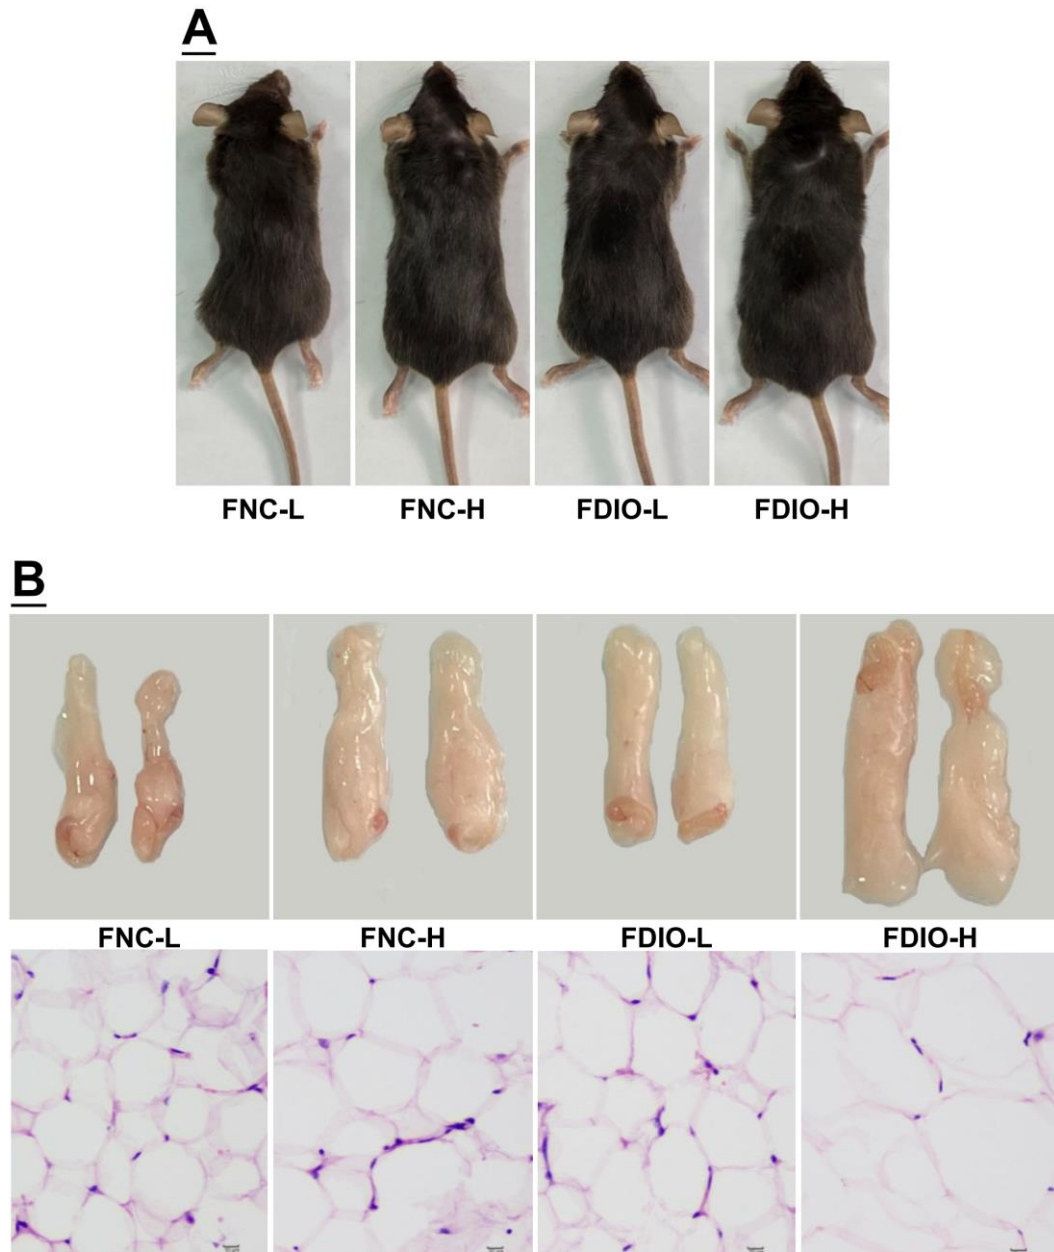

Supplement: s1 [file s1]
